# Supplementary material
Source: bioRxiv or medRxiv preprint supplement (https://www.biorxiv.org/highwire/filestream/105474/field_highwire_adjunct_files/0/347542-1.pdf)
Supplement: Supplementary file [file 347542-1.pdf]

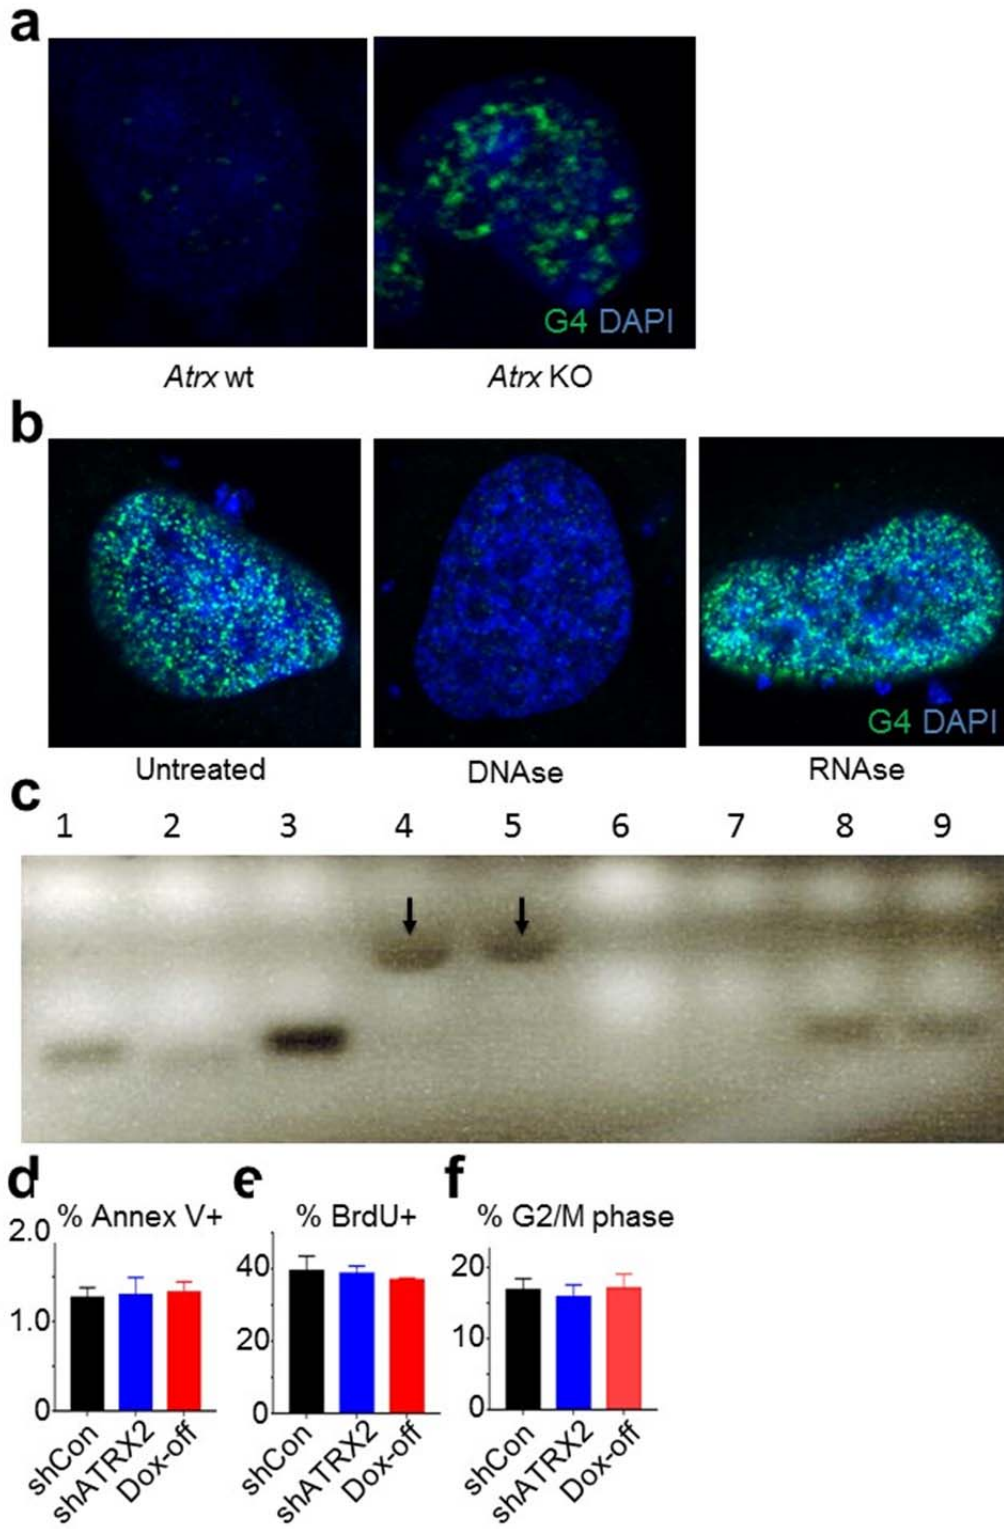

741

742

743 **Supplementary FIG. 1: ATRX deficiency promotes G4 formation.** **a:** G4 staining in  
744 primary murine neural progenitor cells harboring either intact or inactivated *Atrx*<sup>38</sup>. **b:**  
745 NHAs treated with 50nM CX-3543 alone (left), or with either DNase (middle), or RNase  
746 (right) to confirm the specificity of the 1H6 antibody. **c:** Confirmation of specificity for Hf2  
747 G4 pulldowns using kit2 G4 nucleotides. Hf2 antibodies were incubated with  
748 kit2+random ssDNA mixture, no elution (lane 4), kit2+random dsDNA, no elution (lane  
749 5), ssDNA alone (lane 6), dsDNA alone (lane 7), kit2+ssDNA, eluted (lane 8) and  
750 kit2+dsDNA, eluted (lane 9). Kit2 (lane 1), ssDNA (lane 2) and dsDNA (lane 3) were also  
751 included in the electrophoresis. Samples were run on a 3% agarose gel, non-denaturing.  
752 Arrows showed gel shift due to binding of pulldown antibodies. **d-f:** Inducible NHA lines  
753 showed no effects of ATRX inactivation on either apoptosis (measured by Annexin V  
754 positive population, d) or proliferation (measured by BrdU incorporation, e; G2/M-phase  
755 content (4n), f).  
756

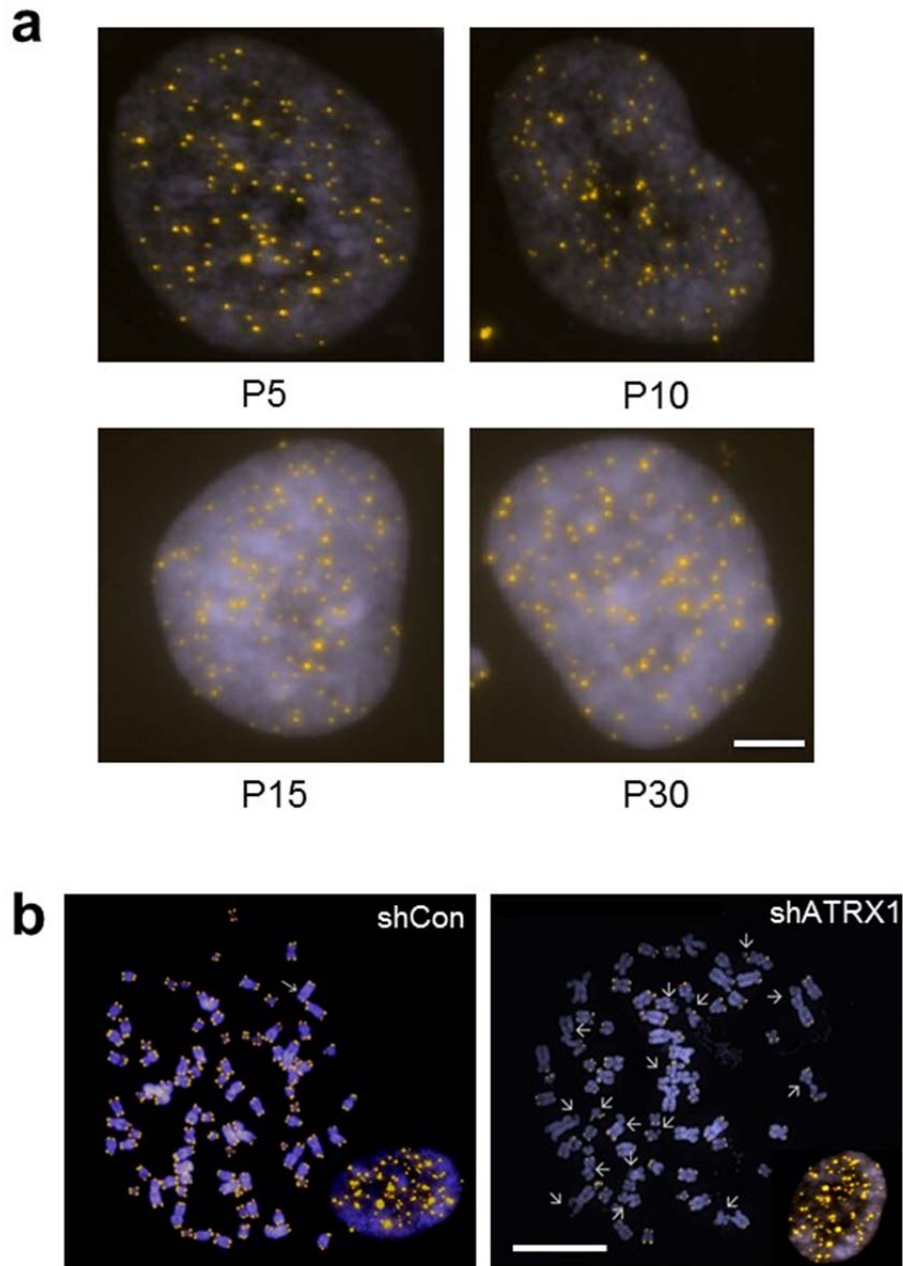

757

758 **Supplementary FIG. 2: ATRX knockdown induces chromosome breaks, but not**

759 **ALT in NHAs. a:** TEL-FISH of NHAs at passages 5, 10, 15 and 30 after ATRX

760 knockdown. **b:** ATRX deficient NHAs (shATRX1, passage 15) showed significantly

761 increased chromosome breaks by cytogenetic analysis. Despite these chromosome

762 abnormalities, Tel-FISH (yellow) showed no change in telomere signal.

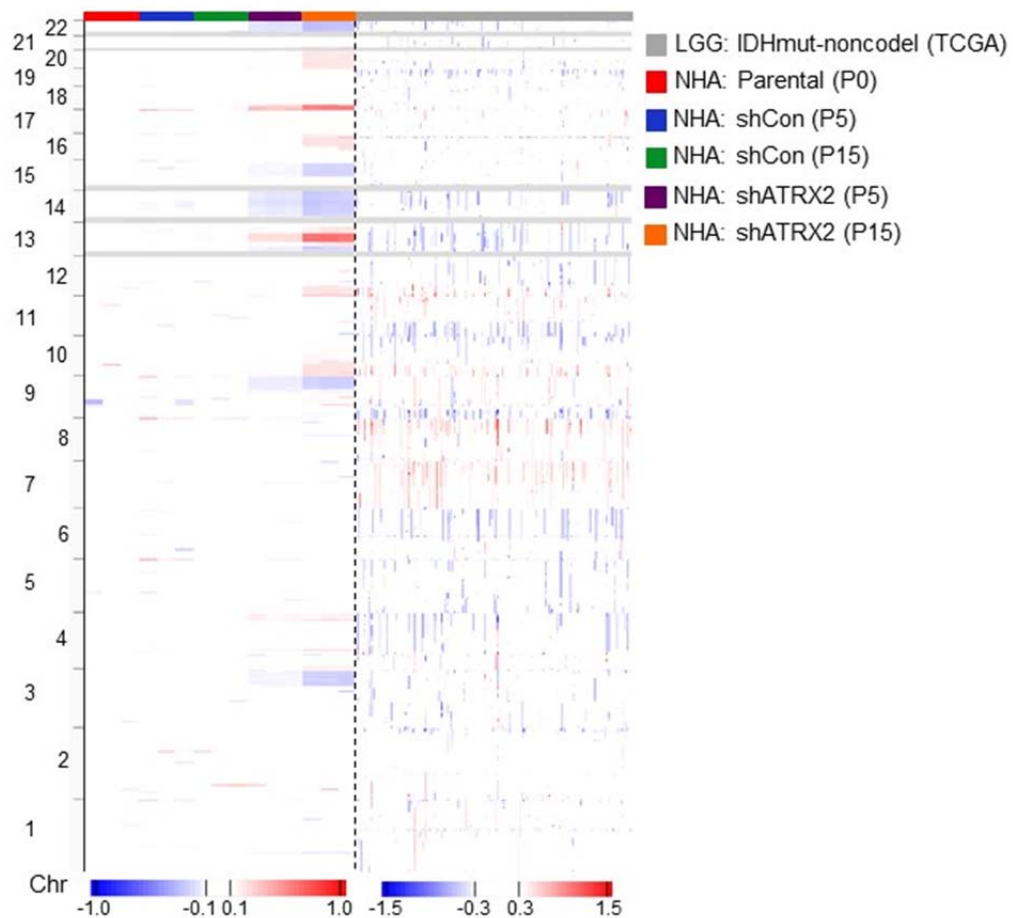

763  
764

**Supplementary FIG. 3: ATRX deficiency induces CNAs in NHAs and is associated**

765

**with a distinct CNA profile in gliomas.** Segmented SNP array data for parental NHAs,

766

shCon NHAs (P5 and P15), shATRX1 NHAs (P5 and p15) and IDHmut-noncodel LGG

767

patients visualized by IGV.

768

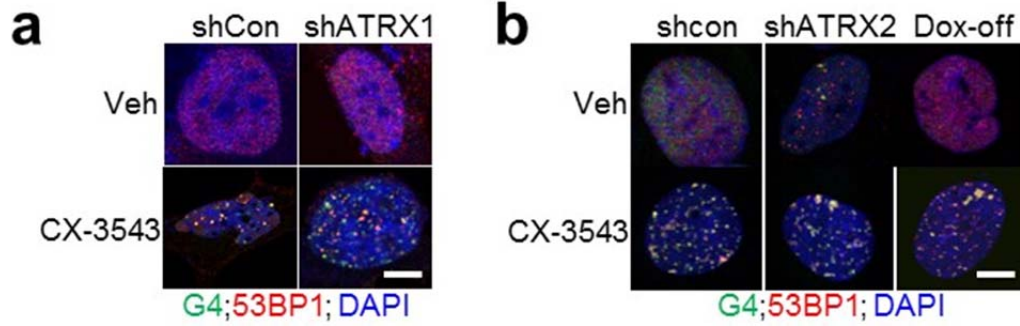

769  
 770

**Supplementary FIG. 4: G4s colocalize with DNA damage foci induced by CX-3543.**

771 G4 and 53BP1 coimmunofluorescence of stable (a) and inducible (b) shATRX NHAs

772 treated with 100 nM CX-3543 (DAPI counterstain).

773

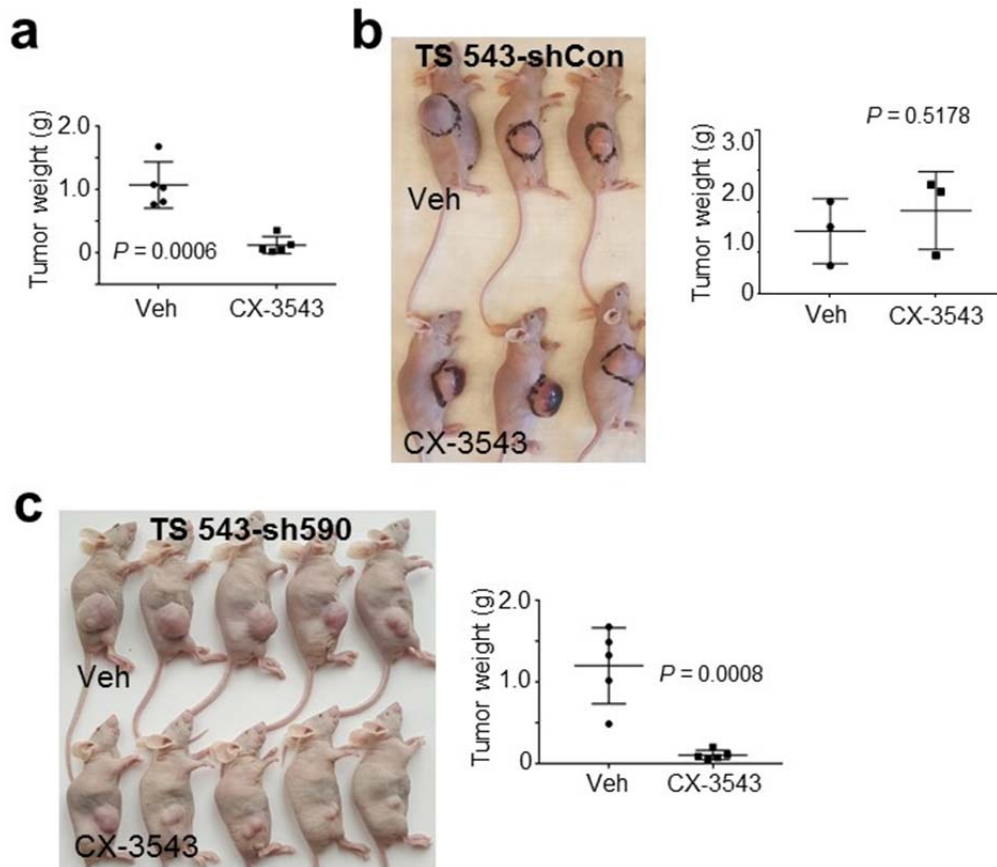

774

775 **Supplementary FIG. 5: CX-3543 markedly slows the growth of ATRX-mutant**  
 776 **glioma xenografts *in vivo*.** **a:** Tumor weights of JHH-273 xenografts at study endpoint  
 777 (See Materials and Methods) following treatment with either vehicle control (Veh) or 12.5  
 778 mg/kg CX-3543. **b:** Representative image of mice bearing TS 543 (ATRX intact)  
 779 xenografts following treatment with either vehicle (veh) or 12.5 mg/kg CX-3543 for 24  
 780 days. Tumor weights of TS543-shCon xenografts at study endpoint (See Materials and  
 781 Methods) following treatment with either vehicle control (Veh) or 12.5 mg/kg CX-3543  
 782 are also shown. **c:** Representative image of mice bearing TS 543 (sh590-ATRX  
 783 knockdown) xenografts following treatment with either vehicle (veh) or 12.5 mg/kg CX-  
 784 3543 for 19 days. Tumor weights of TS543-sh590 (c) xenografts at study endpoint (See  
 785 Materials and Methods) following treatment with either vehicle control (Veh) or 12.5  
 786 mg/kg CX-3543 are also shown.

|          |                        |
|----------|------------------------|
| shCon-1  | ATCTCGCTTGGGCGAGAGTAAG |
| shATRX-1 | GGAAGCTAGCTCTTCAGAAA   |
| shCon-2  | CAACAAGATGAAGAGCACCAA  |
| shATRX-2 | GGAAAGATGATAAAGGAAA    |
| shCon-3  | CAACAAGATGAAGAGCACCAA  |
| sh590    | CGACAGAACTAACCCCTGTAA  |

**Table 1: sequences of shRNA against ATRX**

|                 |                                         |
|-----------------|-----------------------------------------|
| Tel 1/2 - Tel 1 | GGTTTTGAGGGTGAGGGTGAGGGTGAGGGTGAGGGT    |
| Tel 1/2 - Tel 2 | TCCCGACTATCCCTATCCCTATCCCTATCCCTATCCCTA |
| Tel 2-F         | CAAGTTTAAGGTTGTGTTTGTAC                 |
| Tel 2-R         | AAATGAGTTGCAACAGGTACAAT                 |
| Tel X-F         | TGTCTGGGTCTTTGGAGAGG                    |
| Tel X-R         | CCTAACCCATCTGCTGGTTC                    |
| GAPDH CHIP-F    | CGGGATTGTCTGCCCTAATTAT                  |
| GAPDH CHIP-R    | GCACGGAAGGTCACGATGT                     |
| Myc-F           | AGGGCTTCTCAGAGGCTTG                     |
| Myc-R           | GCTGGAATTACTACAGCGAGTT                  |
| ZNF618-F        | CGACGCCACCTAGAGGATAC                    |
| ZNF618-R        | AATCTCTTACCCCTCCACTGC                   |
| ESR1-F          | GCAGATCCAAGCTGTCTTTACTCA                |
| ESR1-R          | GGTGGGCAGAAGAAATCCTTT                   |

**Table 2: primer sequences of G4-ChIP-qPCR**
